# Supplementary material for: What Contributes to Clinician Wellbeing? An Evidence and Gap Map of Clinician Experiences in Primary Care
Source: Research Square preprint supplement (doi:10.21203/rs.3.rs-8380425/v1), 2025-12-18
Supplement: Supplementary file 1 [file 094e2078e8f1d15d986f1eeb.docx]

**Additional file 1 – Full Search Strategies**
**Title:** Full search strategies for all databases

**Description:** This file contains the complete search strategies for MEDLINE, EMBASE, PsycINFO, and CINAHL performed for this evidence and gap map. Searches were conducted by a health sciences librarian (Genevieve Gore) on October 30, 2023.

| Platform | Database(s) | Database coverage dates | # Results | Search Date | Remarks |
| --- | --- | --- | --- | --- | --- |
| OvidSP | Ovid MEDLINE ALL(R) | 1946 - | 3620 | 2023/10/30 | *2013-* |
| OvidSP | EMBASE Classic + EMBASE | 1947 - | 3970 | 2023/10/30 | *Removed conference abstracts, preprints, editorials; 2013-* |
| OvidSP | PsycInfo | 2002 - | 933 | 2023/10/30 | *2013-* |
| EBSCOhost | CINAHL | 1937 - | 3151 | 2023/10/30 | *2013-* |
|  | **TOTAL NUMBER OF RECORDS** | | **11,674** |  |  |

**Limits or filters used: 2013-**

**Ovid MEDLINE(R) ALL <1946 to October 27, 2023>**

| *#* | **Query** | *Results* |
| --- | --- | --- |
| *1* | *health personnel/ or exp faculty, medical/ or exp faculty, nursing/ or medical staff/ or nurses/ or exp nurse practitioners/ or nurse clinicians/ or nurse midwives/ or nurses, pediatric/ or nurses, community health/ or nurses, public health/ or pharmacists/ or physicians/ or general practitioners/ or hospitalists/ or physicians, family/ or physicians, primary care/ or social workers/ or exp patient care team/* | *386071* |
| *2* | *(Care team* or Clinician* or Hospitalist* or doctor* or family medicine group* or ((family or general) adj2 practitioner*) or gp or ((health* or primary care) adj2 (professional* or provider*)) or midwife* or midwives or nurse* or nursing assistant* or pharmacist* or physician* or social worker*).mp.* | *1718214* |
| *3* | *or/1-2* | *1765814* |
| *4* | *adaptation, psychological/ or exp attitude of health personnel/ or exp stress, psychological/ or (Accomplishment* or Attitude* or Benefit* or Burnout or Culture or Engag* or Expectation* or Experience or Experiences or Fatigue or Hope or morale).mp.* | *3832800* |
| *5* | *quality of life/ or exp income/ or motivation/ or achievement/ or aspirations, psychological/ or conflict, psychological/ or goals/ or exp power, psychological/ or (Income or motivation or Outcome* or Ownership or Perception* or Perspective* or "Quality of care" or ("Quality of" adj2 life) or Reaction* or Satisfaction).mp.* | *6650996* |
| *6* | *psychological well-being/ or (Security or Wellbeing or "Well being" or wellness or "Work* environment*" or (Care adj2 provi*) or (clinician adj2 role*)).mp.* | *394819* |
| *7* | *("Culture of safety" or transparency or Discrimination or implicit bias* or overt bias* or unconscious bias* or "Patient behavio*" or ((Political or economic) adj climate*)).mp.* | *215502* |
| *8* | *exp Electronic Health Records/ or (((Autonomy or (Collaborati* and competit* and environment*) or (Health and ((electronic adj2 record*) or IT))) and (interoperability or usability)) or "Learning and practice setting*" or "Physical learning and practice conditions" or Professional relationship*).mp.* | *33942* |
| *9* | *((patient adj (centered or centred) adj focus) or Team structure* or (Team adj3 function*) or (Workplace adj3 (safety or violence)) or (Access adj4 mentor*) or (Inclusi* and connectivity) or ((Flexibility or respon*) adj3 change*) or "Level* of engagement" or ((meaning or purpose) adj2 work*)).mp.* | *86073* |
| *10* | *(Personality trait* or (Personal adj3 (ethics or morals or values)) or (relationship* and social support*) or "Sense of meaning" or meaningful* or (Work life adj (balance or integration)) or Accreditation or high stakes assessment* or (Documentation and reporting and requirement*) or "HR polic*" or "human resource* polic*" or (compensation adj3 issue*) or (Litigation adj2 risk*)).mp.* | *184075* |
| *11* | *health policy/ or (((National or state) adj (policy or policies or practice)) or Reimbursement structure* or "Shifting systems of care" or administrative requirement* or Administrative responsibilit* or (Align* and responsibility and authority) or Clinical responsibilit* or ((Learning or career) adj2 stage*) or Patient population or Specialty related issues).mp.* | *138847* |
| *12* | *(((Student trainee* or "teaching and research") adj2 responsibilit*) or (Clinical Competency adj2 level*) or Communication skill* or Coping skill* or Delegation or Empathy or Management or leadership or ((Master* or proficien*) adj5 technolog*) or (Optim* adj1 workflow*)).mp.* | *1752445* |
| *13* | *(Organi#ational skill* or Resilienc* or team building or Teamwork skill* or Bureaucracy or "Congruent organi#ational mission and values" or Culture or leadership or Data collection requirement* or (Diversity and Inclusi*) or (Harass* and discriminat*) or "Level of support").mp.* | *1059549* |
| *14* | *Work engagement/ or work-life balance/ or work performance/ or work schedule tolerance/ or workload/ or (Power dynamic* or (Professional development adj2 opportunit*) or "Scope of practice" or Workload or performance or compensation or (value adj3 work*)).mp.* | *1517868* |
| *15* | *or/4-14* | *11386331* |
| *16* | *ambulatory care/ or ambulatory care facilities/ or community health centers/ or exp general practice/ or general practitioners/ or outpatient clinics, hospital/ or physicians, primary care/ or physicians, family/ or primary health care/ or ("general practi*" or "primary health*" or "family care" or "Family Health" or medical home* or ambulatory care or community based or community health* or family doctor* or "family medicine" or family physician* or family practi* or first line or firstline or front line or frontline or integrated health* or (multidisciplinary adj2 (care or healthcare)) or primary care or primary medical or primary nursing or rural health*).ti,ab,kf.* | *668837* |
| *17* | *focus groups/ or interviews as topic/ or narration/ or qualitative research/ or ((face or f2f or guided or depth or indepth or informal or semistructured or structured or unstructured) adj4 (discussion* or interview* or questionnaire*)).ti,ab,kf. or (ethnograph* or (field adj1 work) or fieldwork or (focus adj1 (group or groups)) or (key adj1 (informant or informants)) or qualitative).ti,ab,kf.* | *540593* |
| *18* | *(Canada* or Canadi* or Alberta* or Calgary* or Edmonton* or "British Columbia*" or Vancouver* or Victoria* or Manitoba* or Winnipeg* or "New Brunswick*" or Fredericton* or Moncton* or Newfoundland* or "New Foundland*" or Labrador* or "St John*" or "Saint John*" or "Northwest Territor*" or Yellowknife* or "Nova Scotia*" or Halifax* or Dalhousie* or Nunavut* or Iqaluit* or Ontario* or Ontarian* or Toronto* or Ottawa* or Hamilton or Queen's or McMaster* or Kingston* or Sudbury* or "Prince Edward Island*" or Charlottetown* or Quebec* or Montreal* or McGill* or Laval* or Sherbrooke* or Nunavik* or Kuujjuaq* or Inukjuak* or Puvirnituq* or Saskatchewan* or Saskatoon* or Yukon* or Whitehorse* or Australia* or Belgium* or France* or Paris*).ti,ab,hw,kf.* | *748661* |
| *19* | *3 and 15 and 16 and 17 and 18* | *5202* |
| *20* | *limit 19 to yr=" 2013 -Current"* | *3620* |

**Embase <1996 to 2023 Week 43>**

| *#* | **Query** | *Results* |
| --- | --- | --- |
| *1* | *exp *health care personnel/ or exp *patient care team/* | *506694* |
| *2* | *(Care team* or Clinician* or Hospitalist* or doctor* or family medicine group* or ((family or general) adj2 practitioner*) or gp or ((health* or primary care) adj2 (professional* or provider*)) or midwife* or midwives or nurse* or nursing assistant* or pharmacist* or physician* or social worker*).mp.* | *2037948* |
| *3* | *or/1-2* | *2248452* |
| *4* | *exp psychological adjustment/ or exp health personnel attitude/ or exp job stress/ or (Accomplishment* or Attitude* or Benefit* or Burnout or Culture or Engag* or Expectation* or Experience or Experiences or Fatigue or Hope or morale).mp.* | *4792240* |
| *5* | *exp quality of life/ or income/ or physician income/ or exp "salary and fringe benefit"/ or exp motivation/ or achievement/ or clinical competence/ or nursing competence/ or professional competence/ or goal attainment/ or job performance/ or performance/ or (Income or motivation or Outcome* or Ownership or Perception* or Perspective* or "Quality of care" or "Quality of life" or Reaction* or Satisfaction).ti,ab,kf.* | *6505518* |
| *6* | *wellbeing/ or economic well-being/ or emotional well-being/ or physical well-being/ or professional well-being/ or psychological well-being/ or social well-being/ or spiritual well-being/ or mental health/ or (Security or Wellbeing or "Well being" or wellness or "Work* environment*" or (Care adj2 provi*) or (clinician adj2 role*)).mp.* | *679785* |
| *7* | *("Culture of safety" or transparency or Discrimination or implicit bias* or overt bias* or unconscious bias* or "Patient behavio*" or ((Political or economic) adj climate*)).mp.* | *238969* |
| *8* | *Electronic Health Record/ or (((Autonomy or (Collaborati* and competit* and environment*) or (Health and ((electronic adj2 record*) or IT))) and (interoperability or usability)) or "Learning and practice setting*" or "Physical learning and practice conditions" or Professional relationship*).mp.* | *47087* |
| *9* | *((patient adj (centered or centred) adj focus) or Team structure* or (Team adj3 function*) or (Workplace adj3 (safety or violence)) or (Access adj4 mentor*) or (Inclusi* and connectivity) or ((Flexibility or respon*) adj3 change*) or "Level* of engagement" or ((meaning or purpose) adj2 work*)).mp.* | *89986* |
| *10* | *(Personality trait* or (Personal adj3 (ethics or morals or values)) or (relationship* and social support*) or "Sense of meaning" or meaningful* or (Work life adj (balance or integration)) or Accreditation or high stakes assessment* or (Documentation and reporting and requirement*) or "HR polic*" or "human resource* polic*" or (compensation adj3 issue*) or (Litigation adj2 risk*)).mp.* | *233107* |
| *11* | *(((National or state) adj (policy or policies or practice)) or Reimbursement structure* or "Shifting systems of care" or administrative requirement* or Administrative responsibilit* or (Align* and responsibility and authority) or Clinical responsibilit* or ((Learning or career) adj2 stage*) or Patient population or Specialty related issues).mp.* | *109246* |
| *12* | *(((Student trainee* or "teaching and research") adj2 responsibilit*) or (Clinical Competency adj2 level*) or Communication skill* or Coping skill* or Delegation or Empathy or Management or leadership or ((Master* or proficien*) adj5 technolog*) or (Optim* adj1 workflow*)).mp.* | *2759437* |
| *13* | *(Organi#ational skill* or Resilienc* or Teamwork skill* or Bureaucracy or "Congruent organi#ational mission and values" or Culture or leadership or Data collection requirement* or (Diversity and Inclusi*) or (Harass* and discriminat*) or "Level of support").mp.* | *1456850* |
| *14* | *(Power dynamic* or Professional development opportunit* or "Scope of practice" or Workload or performance or compensation or (value adj3 work*)).mp.* | *1990593* |
| *15* | *or/4-14* | *12741784* |
| *16* | *exp *ambulatory care/ or *general practice/ or *general practitioner/ or *outpatient department/ or exp *primary health care/ or *"pharmacy (shop)"/ or *pharmacist/ or *clinical pharmacist/ or *community pharmacist/ or ("general practi*" or "primary health*" or "family care" or "Family Health" or medical home* or ambulatory care or community based or community health* or family doctor* or "family medicine" or family physician* or family practi* or first line or firstline or front line or frontline or integrated health* or (multidisciplinary adj2 (care or healthcare)) or primary care or primary medical or primary nursing or rural health*).ti,ab,kf.* | *762452* |
| *17* | *exp interview/ or exp qualitative research/ or ((face or f2f or guided or depth or indepth or informal or semistructured or structured or unstructured) adj4 (discussion* or interview* or questionnaire*)).ti,ab,kf. or (ethnograph* or (field adj1 work) or fieldwork or (focus adj1 (group or groups)) or (key adj1 (informant or informants)) or qualitative).ti,ab,kf.* | *774739* |
| *18* | *(Canada* or Canadi* or Alberta* or Calgary* or Edmonton* or "British Columbia*" or Vancouver* or Victoria* or Manitoba* or Winnipeg* or "New Brunswick*" or Fredericton* or Moncton* or Newfoundland* or "New Foundland*" or Labrador* or "St John*" or "Saint John*" or "Northwest Territor*" or Yellowknife* or "Nova Scotia*" or Halifax* or Dalhousie* or Nunavut* or Iqaluit* or Ontario* or Ontarian* or Toronto* or Ottawa* or Hamilton or Queen's or McMaster* or Kingston* or Sudbury* or "Prince Edward Island*" or Charlottetown* or Quebec* or Montreal* or McGill* or Laval* or Sherbrooke* or Nunavik* or Kuujjuaq* or Inukjuak* or Puvirnituq* or Saskatchewan* or Saskatoon* or Yukon* or Whitehorse* or Australia* or Belgium* or France* or Paris*).ti,ab,hw,kf.* | *863439* |
| *19* | *3 and 15 and 16 and 17 and 18* | *7575* |
| *20* | *limit 19 to yr=" 2013 -Current"* | *5447* |
| *21* | *limit 20 to "remove preprint records"* | *5447* |
| *22* | *limit 20 to conference abstract status* | *1473* |
| *23* | *limit 20 to editorial* | *4* |
| *24* | *22 or 23* | *1477* |
| *25* | *21 not 24* | *3970* |

**APA PsycInfo <2002 to October Week 3 2023>**

| *#* | **Query** | *Results* |
| --- | --- | --- |
| *1* | *health personnel/ or exp social workers/ or nurses/ or public health service nurses/ or school nurses/ or physicians/ or family physicians/ or general practitioners/ or internists/ or clinicians/* | *91536* |
| *2* | *(Care team* or Clinician* or Hospitalist* or doctor* or family medicine group* or ((family or general) adj2 practitioner*) or gp or ((health* or primary care) adj2 (professional* or provider*)) or midwife* or midwives or nurse* or nursing assistant* or pharmacist* or physician* or social worker*).mp.* | *321488* |
| *3* | *1 or 2* | *327661* |
| *4* | *exp emotional adjustment/ or "resilience (psychological)"/ or health personnel attitudes/ or exp health care personnel measures/ or exp professional measures/ or psychological stress/ or "stress and coping measures"/ or (Accomplishment* or Attitude* or Benefit* or Burnout or Culture or Engag* or Expectation* or Experience or Experiences or Fatigue or Hope or morale).mp.* | *1290946* |
| *5* | *"quality of work life"/ or exp well being/ or income level/ or exp "income (economic)"/ or salaries/ or exp motivation/ or achievement/ or exp achievement potential/ or exp failure/ or occupational success/ or exp achievement measures/ or exp competence/ or exp impostor phenomenon/ or exp performance/ or exp productivity/ or exp aspirations/ or exp needs/ or occupational aspirations/ or goal orientation/ or goal setting/ or exp goals/ or job satisfaction/ or career change/ or employee engagement/ or employee retention/ or employee well being/ or job enrichment/ or job involvement/ or organizational commitment/ or role satisfaction/ or (Income or motivation or Outcome* or Ownership or Perception* or Perspective* or "Quality of care" or "Quality of life" or Reaction* or Satisfaction).mp.* | *1464722* |
| *6* | *psychological well-being/ or (Security or Wellbeing or "Well being" or wellness or "Work* environment*" or (Care adj2 provi*) or (clinician adj2 role*)).mp.* | *202967* |
| *7* | *exp conflict/ or ("Culture of safety" or transparency or Discrimination or implicit bias* or overt bias* or unconscious bias* or "Patient behavio*" or ((Political or economic) adj climate*)).mp.* | *208260* |
| *8* | *exp Electronic Health Records/ or (((Autonomy or (Collaborati* and competit* and environment*) or (Health and ((electronic adj2 record*) or IT))) and (interoperability or usability)) or "Learning and practice setting*" or "Physical learning and practice conditions" or Professional relationship*).mp.* | *3493* |
| *9* | *((patient adj (centered or centred) adj focus) or Team structure* or (Team adj3 function*) or (Workplace adj3 (safety or violence)) or (Access adj4 mentor*) or (Inclusi* and connectivity) or ((Flexibility or respon*) adj3 change*) or "Level* of engagement" or ((meaning or purpose) adj2 work*)).mp.* | *20512* |
| *10* | *(Personality trait* or (Personal adj3 (ethics or morals or values)) or (relationship* and social support*) or "Sense of meaning" or meaningful* or (Work life adj (balance or integration)) or Accreditation or high stakes assessment* or (Documentation and reporting and requirement*) or "HR polic*" or "human resource* polic*" or (compensation adj3 issue*) or (Litigation adj2 risk*)).mp.* | *132686* |
| *11* | *government policy making/ or policy making/ or health care reimbursement/ or (((National or state) adj (policy or policies or practice)) or Reimbursement structure* or "Shifting systems of care" or administrative requirement* or Administrative responsibilit* or (Align* and responsibility and authority) or Clinical responsibilit* or ((Learning or career) adj2 stage*) or Patient population or Specialty related issues).mp.* | *53374* |
| *12* | *(((Student trainee* or "teaching and research") adj2 responsibilit*) or (Clinical Competency adj2 level*) or Communication skill* or Coping skill* or Delegation or Empathy or Management or leadership or ((Master* or proficien*) adj5 technolog*) or (Optim* adj1 workflow*)).mp.* | *336659* |
| *13* | *(Organi#ational skill* or Resilienc* or team building or Teamwork skill* or Bureaucracy or "Congruent organi#ational mission and values" or Culture or leadership or Data collection requirement* or (Diversity and Inclusi*) or (Harass* and discriminat*) or "Level of support").mp.* | *245785* |
| *14* | *job performance/ or exp employee attitudes/ or job involvement/ or job knowledge/ or organizational commitment/ or exp work load/ or (Power dynamic* or (Professional development adj2 opportunit*) or "Scope of practice" or Workload or performance or compensation or (value adj3 work*)).mp.* | *384114* |
| *15* | *or/4-14* | *2447759* |
| *16* | *exp primary health care/ or ("general practi*" or "primary health*" or "family care" or "Family Health" or medical home* or ambulatory care or community based or community health* or family doctor* or "family medicine" or family practi* or first line or firstline or front line or frontline or integrated health* or (multidisciplinary adj2 (care or healthcare)) or primary care or primary medical or primary nursing or rural health*).mp.* | *119836* |
| *17* | *exp qualitative methods/ or exp interviews/ or exp mixed methods research/ or phenomenology/ or qualitative measures/ or (((face or f2f or guided or depth or indepth or informal or semistructured or structured or unstructured) adj4 (discussion* or interview* or questionnaire*)) or (ethnograph* or (field adj1 work) or fieldwork or (focus adj1 (group or groups)) or (key adj1 (informant or informants)) or qualitative)).mp.* | *385689* |
| *18* | *(Canada* or Canadi* or Alberta* or Calgary* or Edmonton* or "British Columbia*" or Vancouver* or Victoria* or Manitoba* or Winnipeg* or "New Brunswick*" or Fredericton* or Moncton* or Newfoundland* or "New Foundland*" or Labrador* or "St John*" or "Saint John*" or "Northwest Territor*" or Yellowknife* or "Nova Scotia*" or Halifax* or Dalhousie* or Nunavut* or Iqaluit* or Ontario* or Ontarian* or Toronto* or Ottawa* or Hamilton or Queen's or McMaster* or Kingston* or Sudbury* or "Prince Edward Island*" or Charlottetown* or Quebec* or Montreal* or McGill* or Laval* or Sherbrooke* or Nunavik* or Kuujjuaq* or Inukjuak* or Puvirnituq* or Saskatchewan* or Saskatoon* or Yukon* or Whitehorse* or Australia* or Belgium* or France* or Paris*).mp.* | *176778* |
| *19* | *3 and 15 and 16 and 17 and 18* | *1512* |
| *20* | *limit 19 to yr="2013 -Current"* | *933* |

**CINAHL**

| **#** | **Query** | **Limiters/Expanders** | **Last Run Via** | **Results** |
| --- | --- | --- | --- | --- |
| S48 | S4 AND S30 AND S42 AND S45 AND S46 | Limiters - Published Date: 20130101-20231231 Search modes - Boolean/Phrase | Interface - EBSCOhost Research Databases Search Screen - Advanced Search Database - CINAHL Plus with Full Text | 3,151 |
| S47 | S4 AND S30 AND S42 AND S45 AND S46 | Search modes - Boolean/Phrase | Interface - EBSCOhost Research Databases Search Screen - Advanced Search Database - CINAHL Plus with Full Text | 4,712 |
| S46 | (Canada* OR Canadi* OR Alberta* OR Calgary* OR Edmonton* OR "British Columbia*" OR Vancouver* OR Victoria* OR Manitoba* OR Winnipeg* OR "New Brunswick*" OR Fredericton* OR Moncton* OR Newfoundland* OR "New Foundland*" OR Labrador* OR "St John*" OR "Saint John*" OR "Northwest Territor*" OR Yellowknife* OR "Nova Scotia*" OR Halifax* OR Dalhousie* OR Nunavut* OR Iqaluit* OR Ontario* OR Ontarian* OR Toronto* OR Ottawa* OR Hamilton OR Queen's OR McMaster* OR Kingston* OR Sudbury* OR "Prince Edward Island*" OR Charlottetown* OR Quebec* OR Montreal* OR McGill* OR Laval* OR Sherbrooke* OR Nunavik* OR Kuujjuaq* OR Inukjuak* OR Puvirnituq* OR Saskatchewan* OR Saskatoon* OR Yukon* OR Whitehorse* OR Australia* OR Belgium* OR France* OR Paris*) | Search modes - Boolean/Phrase | Interface - EBSCOhost Research Databases Search Screen - Advanced Search Database - CINAHL Plus with Full Text | 454,905 |
| S45 | S43 OR S44 | Search modes - Boolean/Phrase | Interface - EBSCOhost Research Databases Search Screen - Advanced Search Database - CINAHL Plus with Full Text | 461,489 |
| S44 | (((TI face OR AB face) OR (TI f2f OR AB f2f) OR (TI guided OR AB guided) OR (TI depth OR AB depth) OR (TI indepth OR AB indepth) OR (TI informal OR AB informal) OR (TI semistructured OR AB semistructured) OR (TI structured OR AB structured) OR (TI unstructured OR AB unstructured)) N4 ((TI discussion* OR AB discussion*) OR (TI interview* OR AB interview*) OR (TI questionnaire* OR AB questionnaire*))) OR ((TI ethnograph* OR AB ethnograph*) OR ((TI field OR AB field) N1 (TI work OR AB work)) OR (TI fieldwork OR AB fieldwork) OR ((TI focus OR AB focus) N1 ((TI group OR AB group) OR (TI groups OR AB groups))) OR ((TI key OR AB key) N1 ((TI informant OR AB informant) OR (TI informants OR AB informants))) OR (TI qualitative OR AB qualitative)) | Search modes - Boolean/Phrase | Interface - EBSCOhost Research Databases Search Screen - Advanced Search Database - CINAHL Plus with Full Text | 270,153 |
| S43 | (MH "Qualitative Studies+") OR (MH "Qualitative Validity+") OR (MH "Focus Groups") OR (MH "Delphi Technique") OR (MH "Interviews+") OR (MH "Narratives+") | Search modes - Boolean/Phrase | Interface - EBSCOhost Research Databases Search Screen - Advanced Search Database - CINAHL Plus with Full Text | 366,390 |
| S42 | S31 OR S32 OR S33 OR S34 OR S35 OR S36 OR S37 OR S38 OR S39 OR S40 OR S41 | Search modes - Boolean/Phrase | Interface - EBSCOhost Research Databases Search Screen - Advanced Search Database - CINAHL Plus with Full Text | 337,869 |
| S41 | ((TI "general practi*" OR AB "general practi*") OR (TI "primary health*" OR AB "primary health*") OR (TI "family care" OR AB "family care") OR (TI "Family Health" OR AB "Family Health") OR (TI "medical home*" OR AB "medical home*") OR (TI "ambulatory care" OR AB "ambulatory care") OR (TI "community based" OR AB "community based") OR (TI "community health*" OR AB "community health*") OR (TI "family doctor*" OR AB "family doctor*") OR (TI "family medicine" OR AB "family medicine") OR (TI "family physician*" OR AB "family physician*") OR (TI "family practi*" OR AB "family practi*") OR (TI "first line" OR AB "first line") OR (TI firstline OR AB firstline) OR (TI "front line" OR AB "front line") OR (TI frontline OR AB frontline) OR (TI "integrated health*" OR AB "integrated health*") OR ((TI multidisciplinary OR AB multidisciplinary) N2 ((TI care OR AB care) OR (TI healthcare OR AB healthcare))) OR (TI "primary care" OR AB "primary care") OR (TI "primary medical" OR AB "primary medical") OR (TI "primary nursing" OR AB "primary nursing") OR (TI "rural health*" OR AB "rural health*") | Search modes - Boolean/Phrase | Interface - EBSCOhost Research Databases Search Screen - Advanced Search Database - CINAHL Plus with Full Text | 257,398 |
| S40 | (MH "Outpatient Service") | Search modes - Boolean/Phrase | Interface - EBSCOhost Research Databases Search Screen - Advanced Search Database - CINAHL Plus with Full Text | 11,681 |
| S39 | (MH "Primary Health Care") OR (MH "Access to Primary Care") OR (MH "Primary Care Nurse Practitioners") | Search modes - Boolean/Phrase | Interface - EBSCOhost Research Databases Search Screen - Advanced Search Database - CINAHL Plus with Full Text | 73,407 |
| S38 | (MH "Physicians, Family") | Search modes - Boolean/Phrase | Interface - EBSCOhost Research Databases Search Screen - Advanced Search Database - CINAHL Plus with Full Text | 23,205 |
| S37 | (MH "Family Practice") | Search modes - Boolean/Phrase | Interface - EBSCOhost Research Databases Search Screen - Advanced Search Database - CINAHL Plus with Full Text | 26,476 |
| S36 | (MH "Rural Health Services") | Expanders - Apply equivalent subjects Search modes - Boolean/Phrase | Interface - EBSCOhost Research Databases Search Screen - Advanced Search Database - CINAHL Plus with Full Text | 7,396 |
| S35 | (MH "Rural Health Personnel") | Expanders - Apply equivalent subjects Search modes - Boolean/Phrase | Interface - EBSCOhost Research Databases Search Screen - Advanced Search Database - CINAHL Plus with Full Text | 763 |
| S34 | (MH "Rural Health Centers") | Expanders - Apply equivalent subjects Search modes - Boolean/Phrase | Interface - EBSCOhost Research Databases Search Screen - Advanced Search Database - CINAHL Plus with Full Text | 431 |
| S33 | (MH "Community Health Centers+") | Expanders - Apply equivalent subjects Search modes - Boolean/Phrase | Interface - EBSCOhost Research Databases Search Screen - Advanced Search Database - CINAHL Plus with Full Text | 7,327 |
| S32 | (MH "Ambulatory Care Facilities+") | Expanders - Apply equivalent subjects Search modes - Boolean/Phrase | Interface - EBSCOhost Research Databases Search Screen - Advanced Search Database - CINAHL Plus with Full Text | 17,781 |
| S31 | (MH "Ambulatory Care") | Expanders - Apply equivalent subjects Search modes - Boolean/Phrase | Interface - EBSCOhost Research Databases Search Screen - Advanced Search Database - CINAHL Plus with Full Text | 13,954 |
| S30 | S5 OR S6 OR S7 OR S8 OR S9 OR S10 OR S11 OR S12 OR S13 OR S14 OR S15 OR S16 OR S17 OR S18 OR S19 OR S20 OR S21 OR S22 OR S23 OR S24 OR S25 OR S26 OR S27 OR S28 OR S29 | Search modes - Boolean/Phrase | Interface - EBSCOhost Research Databases Search Screen - Advanced Search Database - CINAHL Plus with Full Text | 2,616,573 |
| S29 | TI ( ("Power dynamic*" OR ("Professional development" N2 opportunit*) OR "Scope of practice" OR Workload OR performance OR compensation OR (value N3 work*)) ) OR AB ( ("Power dynamic*" OR ("Professional development" N2 opportunit*) OR "Scope of practice" OR Workload OR performance OR compensation OR (value N3 work*)) ) | Search modes - Boolean/Phrase | Interface - EBSCOhost Research Databases Search Screen - Advanced Search Database - CINAHL Plus with Full Text | 281,995 |
| S28 | (MH "Workload") OR (MH "Workload Measurement") OR (MH "Nurse-Patient Ratio") | Expanders - Apply equivalent subjects Search modes - Boolean/Phrase | Interface - EBSCOhost Research Databases Search Screen - Advanced Search Database - CINAHL Plus with Full Text | 23,545 |
| S27 | (MH "Support, Social+") | Search modes - Boolean/Phrase | Interface - EBSCOhost Research Databases Search Screen - Advanced Search Database - CINAHL Plus with Full Text | 102,306 |
| S26 | (MH "Work Environment+") | Expanders - Apply equivalent subjects Search modes - Boolean/Phrase | Interface - EBSCOhost Research Databases Search Screen - Advanced Search Database - CINAHL Plus with Full Text | 40,494 |
| S25 | (MH "Job Performance") | Expanders - Apply equivalent subjects Search modes - Boolean/Phrase | Interface - EBSCOhost Research Databases Search Screen - Advanced Search Database - CINAHL Plus with Full Text | 6,526 |
| S24 | (MH "Work-Life Balance") | Expanders - Apply equivalent subjects Search modes - Boolean/Phrase | Interface - EBSCOhost Research Databases Search Screen - Advanced Search Database - CINAHL Plus with Full Text | 3,410 |
| S23 | (MH "Work Engagement") | Expanders - Apply equivalent subjects Search modes - Boolean/Phrase | Interface - EBSCOhost Research Databases Search Screen - Advanced Search Database - CINAHL Plus with Full Text | 2,189 |
| S22 | TI ( ((("Student trainee*" OR "teaching and research") N2 responsibilit*) OR ("Clinical Competency" N2 level*) OR "Communication skill*" OR "Coping skill*" OR Delegation OR Empathy OR Management OR leadership OR ((Master* OR proficien*) N5 technolog*) OR (Optim* N1 workflow*)) ("Organi*ational skill*" OR Resilienc* OR "team building" OR "Teamwork skill*" OR Bureaucracy OR "Congruent organi*ational mission and values" OR Culture OR leadership OR "Data collection requirement*" OR (Diversity AND Inclusi*) OR (Harass* AND discriminat*) OR "Level of support") ) OR AB ( ((("Student trainee*" OR "teaching and research") N2 responsibilit*) OR ("Clinical Competency" N2 level*) OR "Communication skill*" OR "Coping skill*" OR Delegation OR Empathy OR Management OR leadership OR ((Master* OR proficien*) N5 technolog*) OR (Optim* N1 workflow*)) ("Organi*ational skill*" OR Resilienc* OR "team building" OR "Teamwork skill*" OR Bureaucracy OR "Congruent organi*ational mission and values" OR Culture OR leadership OR "Data collection requirement*" OR (Diversity AND Inclusi*) OR (Harass* AND discriminat*) OR "Level of support") ) | Expanders - Apply equivalent subjects Search modes - Boolean/Phrase | Interface - EBSCOhost Research Databases Search Screen - Advanced Search Database - CINAHL Plus with Full Text | 521 |
| S21 | TI ( (((National OR state) W1 (policy OR policies OR practice)) OR "Reimbursement structure*" OR "Shifting systems of care" OR "administrative requirement*" OR "Administrative responsibilit*" OR (Align* AND responsibility AND authority) OR "Clinical responsibilit*" OR ((Learning OR career) N2 stage*) OR "Patient population" OR "Specialty related issues") ) OR AB ( (((National OR state) W1 (policy OR policies OR practice)) OR "Reimbursement structure*" OR "Shifting systems of care" OR "administrative requirement*" OR "Administrative responsibilit*" OR (Align* AND responsibility AND authority) OR "Clinical responsibilit*" OR ((Learning OR career) N2 stage*) OR "Patient population" OR "Specialty related issues") ) | Search modes - Boolean/Phrase | Interface - EBSCOhost Research Databases Search Screen - Advanced Search Database - CINAHL Plus with Full Text | 26,509 |
| S20 | TI ( ("Personality trait*" OR (Personal N3 (ethics OR morals OR values)) OR (relationship* AND "social support*") OR "Sense of meaning" OR meaningful* OR ("Work life" W1 (balance OR integration)) OR Accreditation OR "high stakes assessment*" OR (Documentation AND reporting AND requirement*) OR "HR polic*" OR "human resource* polic*" OR (compensation N3 issue*) OR (Litigation N2 risk*)) ) OR AB ( ("Personality trait*" OR (Personal N3 (ethics OR morals OR values)) OR (relationship* AND "social support*") OR "Sense of meaning" OR meaningful* OR ("Work life" W1 (balance OR integration)) OR Accreditation OR "high stakes assessment*" OR (Documentation AND reporting AND requirement*) OR "HR polic*" OR "human resource* polic*" OR (compensation N3 issue*) OR (Litigation N2 risk*)) ) | Search modes - Boolean/Phrase | Interface - EBSCOhost Research Databases Search Screen - Advanced Search Database - CINAHL Plus with Full Text | 71,048 |
| S19 | TI ( ((patient W1 (centered OR centred) W1 focus) OR "Team structure*" OR (Team N3 function*) OR (Workplace N3 (safety OR violence)) OR (Access N4 mentor*) OR (Inclusi* AND connectivity) OR ((Flexibility OR respon*) N3 change*) OR "Level* of engagement" OR ((meaning OR purpose) N2 work*)) ) OR AB ( ((patient W1 (centered OR centred) W1 focus) OR "Team structure*" OR (Team N3 function*) OR (Workplace N3 (safety OR violence)) OR (Access N4 mentor*) OR (Inclusi* AND connectivity) OR ((Flexibility OR respon*) N3 change*) OR "Level* of engagement" OR ((meaning OR purpose) N2 work*)) ) | Expanders - Apply equivalent subjects Search modes - Boolean/Phrase | Interface - EBSCOhost Research Databases Search Screen - Advanced Search Database - CINAHL Plus with Full Text | 22,720 |
| S18 | TI ( (((Autonomy OR (Collaborati* AND competit* AND environment*) OR (Health AND ((electronic N2 record*) OR IT))) AND (interoperability OR usability)) OR "Learning and practice setting*" OR "Physical learning and practice conditions" OR "Professional relationship*") ) OR AB ( (((Autonomy OR (Collaborati* AND competit* AND environment*) OR (Health AND ((electronic N2 record*) OR IT))) AND (interoperability OR usability)) OR "Learning and practice setting*" OR "Physical learning and practice conditions" OR "Professional relationship*") ) | Expanders - Apply equivalent subjects Search modes - Boolean/Phrase | Interface - EBSCOhost Research Databases Search Screen - Advanced Search Database - CINAHL Plus with Full Text | 3,280 |
| S17 | (MH "Electronic Health Records+") | Expanders - Apply equivalent subjects Search modes - Boolean/Phrase | Interface - EBSCOhost Research Databases Search Screen - Advanced Search Database - CINAHL Plus with Full Text | 29,570 |
| S16 | TI ( (Security OR Wellbeing OR "Well being" OR wellness OR "Work* environment*" OR (Care N2 provi*) OR (clinician N2 role*)) ("Culture of safety" OR transparency OR Discrimination OR "implicit bias*" OR "overt bias*" OR "unconscious bias*" OR "Patient behavio*" OR ((Political OR economic) W1 climate*)) ) OR AB ( (Security OR Wellbeing OR "Well being" OR wellness OR "Work* environment*" OR (Care N2 provi*) OR (clinician N2 role*)) ("Culture of safety" OR transparency OR Discrimination OR "implicit bias*" OR "overt bias*" OR "unconscious bias*" OR "Patient behavio*" OR ((Political OR economic) W1 climate*)) ) | Expanders - Apply equivalent subjects Search modes - Boolean/Phrase | Interface - EBSCOhost Research Databases Search Screen - Advanced Search Database - CINAHL Plus with Full Text | 15 |
| S15 | (MH "Psychological Well-Being") OR (MH "Wellness") | Expanders - Apply equivalent subjects Search modes - Boolean/Phrase | Interface - EBSCOhost Research Databases Search Screen - Advanced Search Database - CINAHL Plus with Full Text | 46,058 |
| S14 | TI ( (Income OR motivation OR Outcome* OR Ownership OR Perception* OR Perspective* OR "Quality of care" OR ("Quality of" N2 life) OR Reaction* OR Satisfaction) ) OR AB ( (Income OR motivation OR Outcome* OR Ownership OR Perception* OR Perspective* OR "Quality of care" OR ("Quality of" N2 life) OR Reaction* OR Satisfaction) ) | Expanders - Apply equivalent subjects Search modes - Boolean/Phrase | Interface - EBSCOhost Research Databases Search Screen - Advanced Search Database - CINAHL Plus with Full Text | 1,456,565 |
| S13 | (MH "Goals and Objectives+") | Expanders - Apply equivalent subjects Search modes - Boolean/Phrase | Interface - EBSCOhost Research Databases Search Screen - Advanced Search Database - CINAHL Plus with Full Text | 45,243 |
| S12 | (MH "Achievement+") | Expanders - Apply equivalent subjects Search modes - Boolean/Phrase | Interface - EBSCOhost Research Databases Search Screen - Advanced Search Database - CINAHL Plus with Full Text | 10,628 |
| S11 | (MH "Motivation+") | Search modes - Boolean/Phrase | Interface - EBSCOhost Research Databases Search Screen - Advanced Search Database - CINAHL Plus with Full Text | 114,653 |
| S10 | (MH "Income+") | Expanders - Apply equivalent subjects Search modes - Boolean/Phrase | Interface - EBSCOhost Research Databases Search Screen - Advanced Search Database - CINAHL Plus with Full Text | 60,629 |
| S9 | (MH "Quality of Working Life") | Expanders - Apply equivalent subjects Search modes - Boolean/Phrase | Interface - EBSCOhost Research Databases Search Screen - Advanced Search Database - CINAHL Plus with Full Text | 2,699 |
| S8 | TI ( (Accomplishment* OR Attitude* OR Benefit* OR Burnout OR Culture OR Engag* OR Expectation* OR Experience OR Experiences OR Fatigue OR Hope OR morale) ) OR AB ( (Accomplishment* OR Attitude* OR Benefit* OR Burnout OR Culture OR Engag* OR Expectation* OR Experience OR Experiences OR Fatigue OR Hope OR morale) ) | Expanders - Apply equivalent subjects Search modes - Boolean/Phrase | Interface - EBSCOhost Research Databases Search Screen - Advanced Search Database - CINAHL Plus with Full Text | 1,031,099 |
| S7 | (MH "Stress, Psychological+") | Search modes - Boolean/Phrase | Interface - EBSCOhost Research Databases Search Screen - Advanced Search Database - CINAHL Plus with Full Text | 104,977 |
| S6 | (MH "Attitude of Health Personnel+") | Search modes - Boolean/Phrase | Interface - EBSCOhost Research Databases Search Screen - Advanced Search Database - CINAHL Plus with Full Text | 126,302 |
| S5 | (MH "Adaptation, Psychological+") | Search modes - Boolean/Phrase | Interface - EBSCOhost Research Databases Search Screen - Advanced Search Database - CINAHL Plus with Full Text | 41,606 |
| S4 | S1 OR S2 OR S3 | Search modes - Boolean/Phrase | Interface - EBSCOhost Research Databases Search Screen - Advanced Search Database - CINAHL Plus with Full Text | 1,360,868 |
| S3 | TI ( ("Care team*" OR Clinician* OR Hospitalist* OR doctor* OR "family medicine group*" OR ((family OR general) N2 practitioner*) OR gp OR ((health* OR "primary care") N2 (professional* OR provider*)) OR midwife* OR midwives OR nurse* OR "nursing assistant*" OR pharmacist* OR physician* OR "social worker*") ) OR AB ( ("Care team*" OR "clinical practice" OR Clinician* OR Hospitalist* OR doctor* OR "family medicine group*" OR ((family OR general) N2 practitioner*) OR gp OR ((health* OR "primary care") N2 (professional* OR provider*)) OR midwife* OR midwives OR nurse* OR "nursing assistant*" OR pharmacist* OR physician* OR "social worker*") ) | Search modes - Boolean/Phrase | Interface - EBSCOhost Research Databases Search Screen - Advanced Search Database - CINAHL Plus with Full Text | 954,768 |
| S2 | (MH "Multidisciplinary Care Team") | Search modes - Boolean/Phrase | Interface - EBSCOhost Research Databases Search Screen - Advanced Search Database - CINAHL Plus with Full Text | 51,264 |
| S1 | (MH "Health Personnel+") | Search modes - Boolean/Phrase | Interface - EBSCOhost Research Databases Search Screen - Advanced Search Database - CINAHL Plus with Full Text | 642,855 |
